# Supplementary material for: LiCl in situ decorated metal–organic framework (MOF)-derived porous carbon for efficient solar-driven atmospheric water harvesting
Source: Royal Society of Chemistry journal article supplement (doi:10.1039/d4ra02364a), 2024-01-01
Supplement: d4ra02364a1.pdf [file d4ra02364a1.pdf]

## Electronic Supplementary Information

# LiCl in-situ decorated metal-organic framework (MOF)-Derived Porous Carbon for Efficient Solar-Driven Atmospheric Water Harvesting

Simiao Guo,<sup>a, b</sup> Yue Hu,<sup>a, b</sup> Zhou Fang,<sup>a, b</sup> Bing Yao,<sup>a, b</sup> and Xinsheng Peng<sup>a, b\*</sup>

<sup>a</sup>State Key Laboratory of Silicon and Advanced Semiconductor Materials, School of Materials Science and Engineering, Zhejiang University, Hangzhou 310058, P. R. China

<sup>b</sup>Wenzhou Key Laboratory of Novel Optoelectronic and Nanomaterials, Institute of Wenzhou, Zhejiang University, Wenzhou 325006, P. R. China

E-mail: pengxinsheng@zju.edu.cn

**The file includes:**

- 1. Equation S1-S8.**
- 2. Figures S1-S12.**
- 3. Tables S1-S2.**

## S1. Calculations to evaluate adsorbent performance

The water adsorption, desorption, and collection capacity ( $\text{g g}^{-1}$ ) were used to evaluate the AWH performance of the sorbents. And the corresponding water uptake and release rates ( $\text{kg kg}^{-1} \text{ h}^{-1}$ ) were calculated to compare their sorption-desorption kinetics. They were calculated by the following equations:

$$\text{Water adsorption} = (W_1 - W_s) / W_s \quad (\text{S1})$$

$$\text{Water desorption} = (W_1 - W_2) / W_s \quad (\text{S2})$$

$$\text{Water collection} = W_3 / W_s \quad (\text{S3})$$

$$\text{Water adsorption rates} = (W_{t1} - W_s) / (W_s \times t_1) \quad (\text{S4})$$

$$\text{Water desorption rates} = (W_1 - W_{t2}) / (W_s \times t_2) \quad (\text{S5})$$

Where  $W_s$  (g) is the weight of the dried sorbents before adsorption tests,  $W_1$  (g) is the weight of the sorbent corresponding to the maximum adsorption value at a certain moment in the adsorption test,  $W_2$  (g) stands for the weight of the samples after desorption for a certain period of time,  $W_3$  (g) is the weight of the collected water after desorption and condensation;  $t_1$  (hours) is the sorption time corresponding to the inflection point before water adsorption reaching equilibrium,  $t_1$  is chosen to be  $\sim 0.833$  hours in this work,  $W_{t1}$  (g) is the weight of sorbents corresponding to  $t_1$ ,  $t_2$  (hours) is the desorption time corresponding to the inflection point before water desorption reaching equilibrium,  $t_2$  is chosen to be  $\sim 0.833$  hours in this work;  $W_{t2}$  (g) is the weight of sorbents corresponding to  $t_2$ .

As for the performance of LiCl in PCl sorbents, the relevant formulas are as follows:

$$\text{Water adsorption} = Q = (Q_{\text{PCl}} - Q_{\text{PCl-w}} \times C_{\text{PCl-w}}) / C_{\text{LiCl}} \quad (\text{S6})$$

$$\text{Water adsorption rates} = Q_{t1} / t_1 \quad (\text{S7})$$

$$\text{Water desorption rates} = (Q_m - Q_{t2}) / t_2 \quad (\text{S8})$$

Where  $Q_{\text{PCl}}$  ( $\text{g g}^{-1}$ ) is the water adsorption capacity of PCl sorbents,  $Q_{\text{PCl-w}}$  ( $\text{g g}^{-1}$ ) is the water adsorption capacity of PCl-w,  $C_{\text{LiCl}}$  (wt.%) represents the loading weight of LiCl in PCl, while  $C_{\text{PCl-w}}$  (wt. %) represents the loading weight of porous carbon after removing LiCl ( $C_{\text{PCl-w}} + C_{\text{LiCl}} = 1$ );  $Q_{t1}$  ( $\text{g g}^{-1}$ ) is the water adsorption of LiCl in PCl sorbents corresponding to  $t_1$ ,  $Q_m$  ( $\text{g g}^{-1}$ ) is the water adsorption of LiCl in PCl when the

reaching water adsorption equilibrium,  $Q_{t_2}$  ( $\text{g g}^{-1}$ ) is the weight of LiCl in PCI sorbents corresponding to  $t_2$ .

## S2. Supporting Figures and Tables

**Table S1.** The amount of LiCl in PCI sorbents according to weighing method.

| Sample | The amount of LiCl (wt. %) |
|--------|----------------------------|
| PCI-1  | 38                         |
| PCI-4  | 36                         |
| PCI-12 | 45                         |

**Note:** The amount of LiCl is calculated by weighing the mass change of adsorbents before and after HCl treatment.

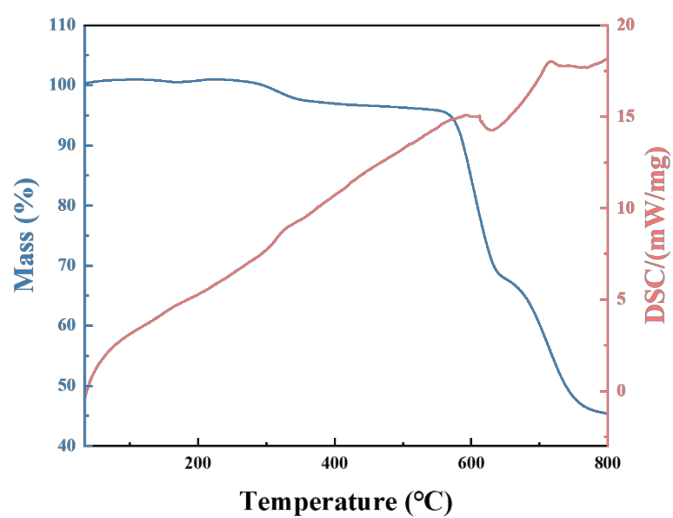

**Fig. S1.** The TG-DSC curves of LiMOF.

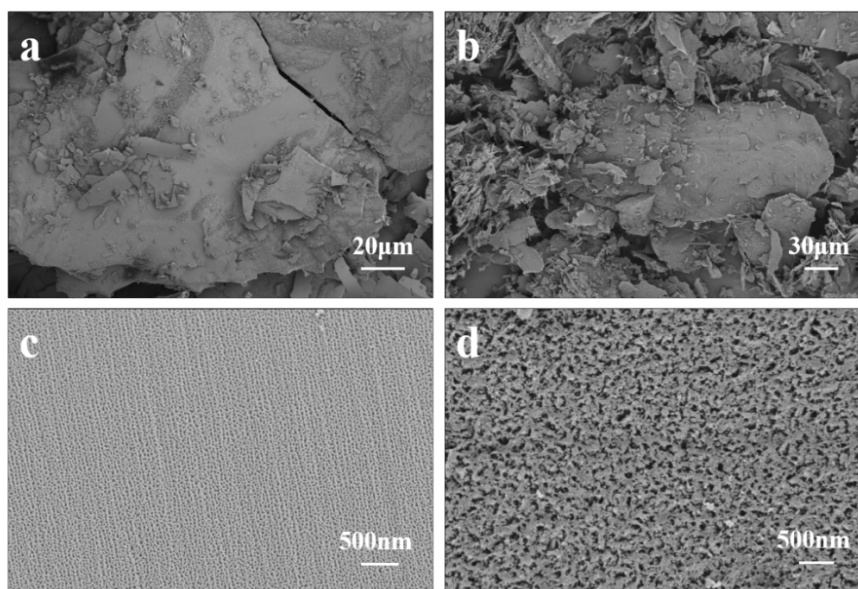

**Fig. S2.** SEM images of PC-500 (a, c) and PC-600 (b, d).

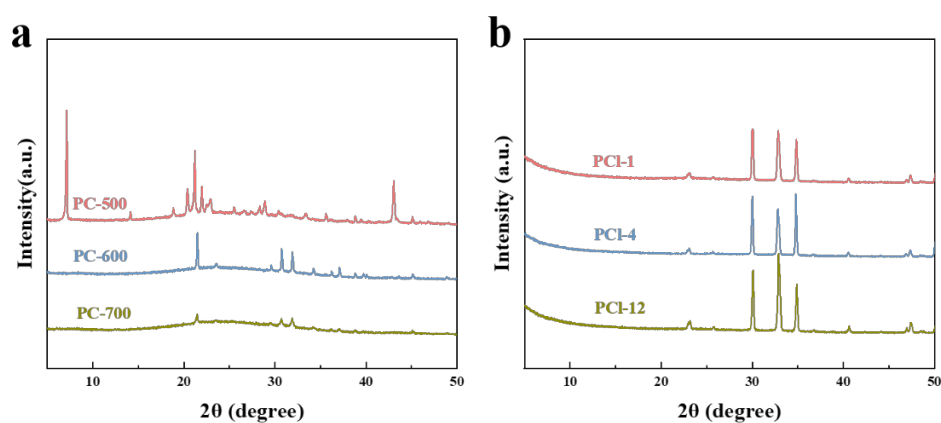

**Fig. S3.** XRD curves of the samples (a) synthesized at different carbonization temperatures and (b) samples with different HCl vapor treatment times.

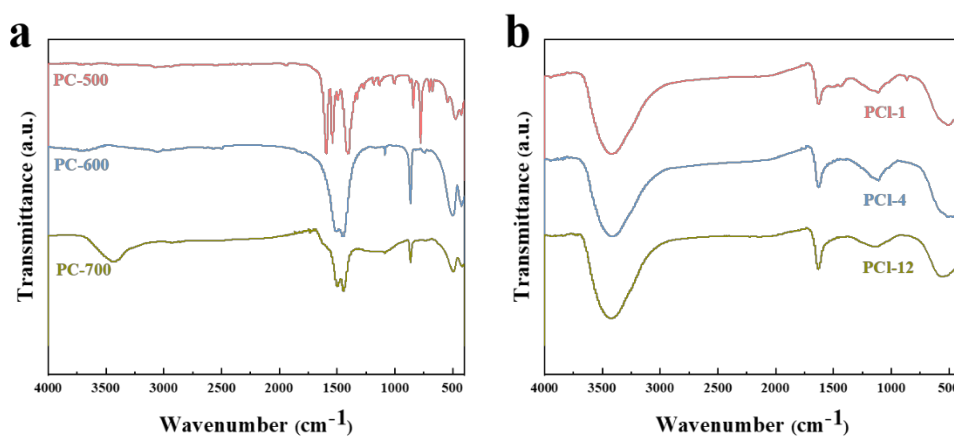

**Fig. S4.** FTIR spectra of the samples (a) synthesized at different carbonization temperatures and (b) samples with different HCl vapor treatment times.

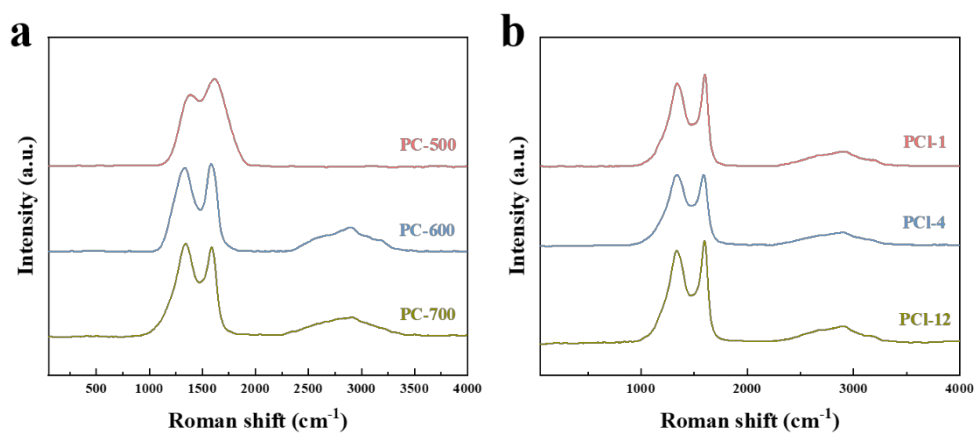

**Fig. S5.** Raman spectra of the samples (a) synthesized at different carbonization temperatures and (b) samples with different HCl vapor treatment times.

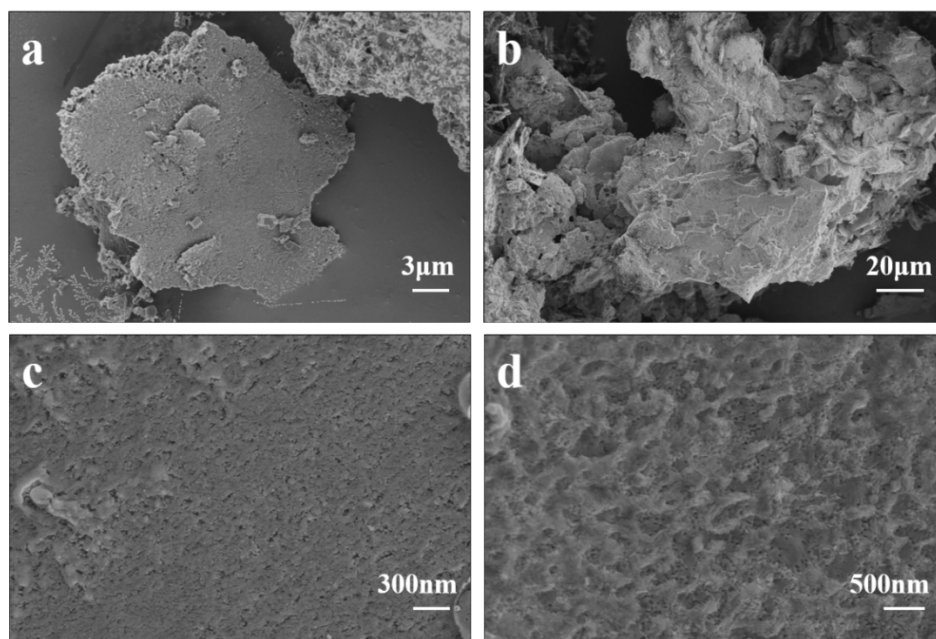

**Fig. S6.** SEM images of PCI-1 (a, c) and PCI-12 (b, d).

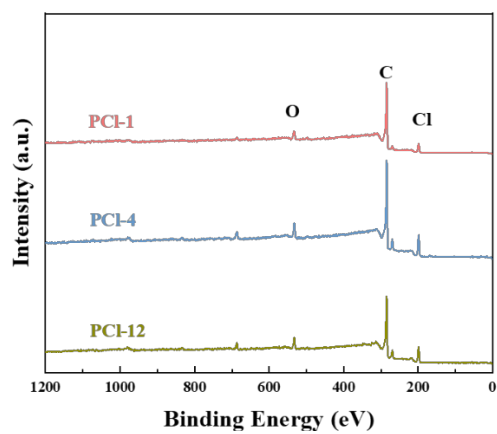

**Fig. S7.** XPS spectra of the samples with different HCl vapor treatment times.

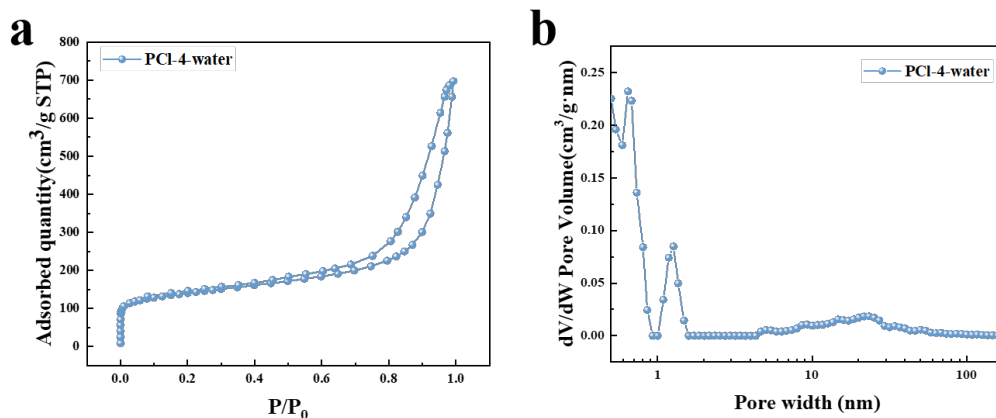

**Fig. S8.** (a) The  $N_2$  adsorption-desorption isotherms and (b) pore size distribution curves of PCI-4-water.

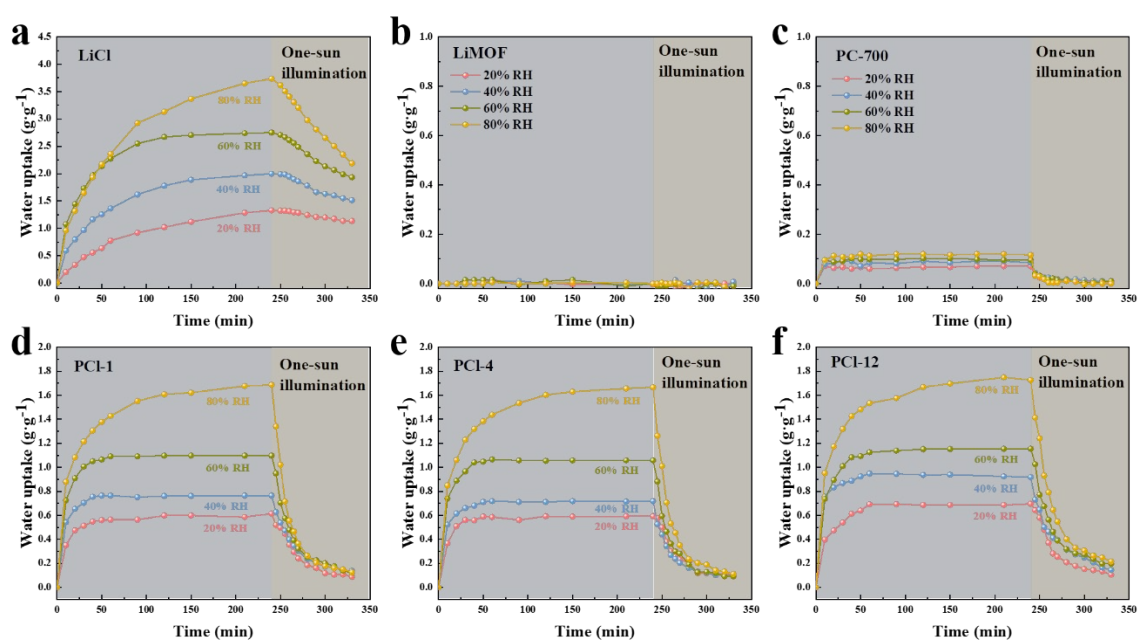

**Fig. S9.** Water uptake curves of (a) LiCl, (b) LiMOF, (c) PC-700, (d) PCI-1, (e) PCI-4, (f) PCI-12.

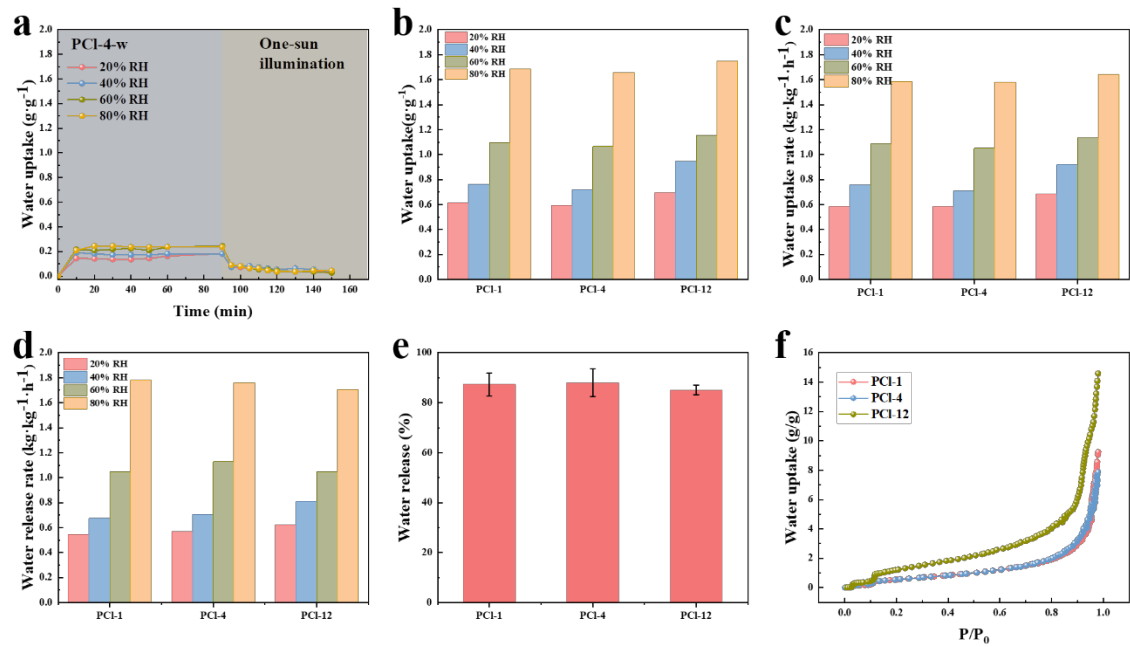

**Fig. S10.** (a) Static water uptake curves of PCI-4-wat 20-80% RH. (b) Water adsorption capacity at 20-80% RH. (c) The calculated water uptake and (d) release rates. (e) Comparison of water release performance. (f) Water vapor sorption performance of PCI-1, PCI-4, PCI-12.

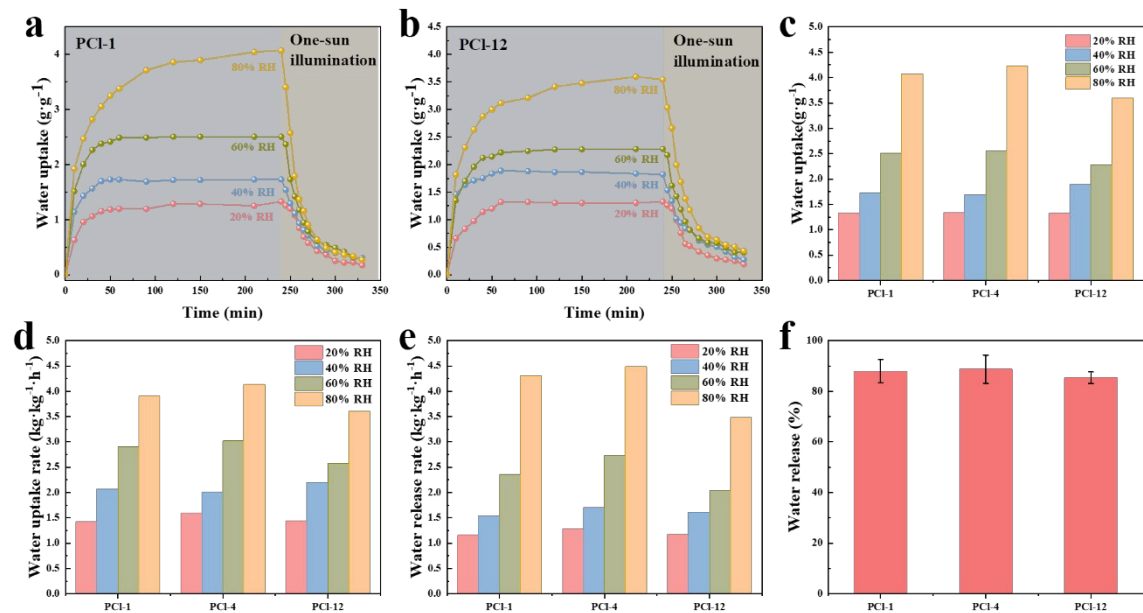

**Fig. S11.** Static water uptake curves of LiCl in PCI-1 (a) and LiCl in PCI-12 (b) at 20-80% RH. (c) Water adsorption capacity of LiCl in PCI at 20-80% RH. (d) The calculated water uptake and (e) release rates of LiCl in PCI. (f) Comparison of water release performance of LiCl in PCI.



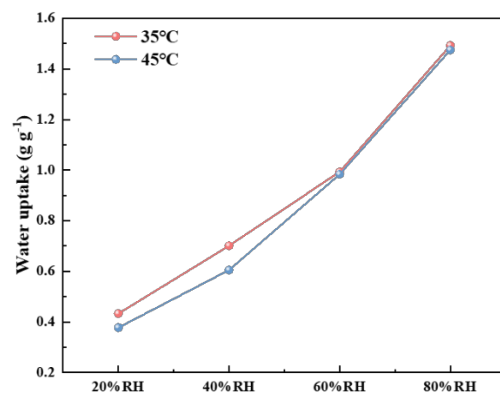

**Fig. S12** Water adsorption capacity of PCl-4 at 35 °C and 45 °C.

**Table S2.** Comparison of the water sorption performance for the sorbents in this work and previous publications.

| Materials                          | Temperature (°C) | Relative humidity (%) | Water uptake (g g <sup>-1</sup> ) | Ref.     |
|------------------------------------|------------------|-----------------------|-----------------------------------|----------|
| MOF-801                            | 25               | 30                    | 0.25                              | 1        |
| Zeolite 13X/LiCl/CaCl <sub>2</sub> | 25               | 80                    | 1.10                              | 2        |
| MOF nanoporous carbon              | 25               | 20                    | 0.13                              | 3        |
| MOF nanoporous carbon              | 25               | 30                    | 0.19                              | 3        |
| MOF nanoporous carbon              | 25               | 40                    | 0.22                              | 3        |
| MOF nanoporous carbon              | 25               | 50                    | 0.23                              | 3        |
| Cellulose fabric                   | 25               | 60                    | 0.31                              | 4        |
| SPHN                               | 25               | 30                    | 0.78                              | 5        |
| SPHN                               | 25               | 60                    | 1.4                               | 5        |
| SPHN                               | 25               | 80                    | 2.01                              | 5        |
| PPy@PC-LiCl                        | 25               | 60                    | 0.85                              | 6        |
| PPy@PC-LiCl                        | 25               | 80                    | 1.45                              | 6        |
| LBC@LiCl                           | 25               | 60                    | 1.12                              | 7        |
| PDMAPS-LiCl                        | 25               | 60                    | 0.62                              | 8        |
| MOF-303                            | 25               | 90                    | 0.45                              | 9        |
| LiCl@UiO-66_30                     | 25               | 10                    | 0.27                              | 10       |
| LiCl@UiO-66_30                     | 25               | 30                    | 0.27                              | 10       |
| LiCl@UiO-66_30                     | 25               | 90                    | 2.15                              | 10       |
| LiCl@MIL-101(Cr)                   | 30               | 30                    | 0.77                              | 11       |
| NU-1500-Cr                         | 25               | 90                    | 1.09                              | 12       |
| NU-605                             | 25               | 90                    | 0.67                              | 13       |
| PCl-4                              | 25               | 20                    | 0.6                               | Our work |
| PCl-4                              | 25               | 40                    | 0.85                              | Our work |
| PCl-4                              | 25               | 60                    | 1.23                              | Our work |
| PCl-4                              | 25               | 80                    | 2.02                              | Our work |

## References

- 1 H. Kim, S. R. Rao, E. A. Kapustin, L. Zhao, S. Yang, O. M. Yaghi and E. N. Wang, *Nat. Commun.*, 2018, **9**, 1191.
- 2 H. Zhao, Z. Wang, Q. Li, T. Wu, M. Zhang and Q. Shi, *Micropor. Mesopor. Mat.*, 2020, **299**, 110109.
- 3 Y. Song, N. Xu, G. Liu, H. Qi, W. Zhao, B. Zhu, L. Zhou and J. Zhu, *Nat. Nanotechnol.*, 2022, **17**, 857-863.
- 4 Y. Zhang, W. Zhu, C. Zhang, J. Peoples, X. Li, A. L. Felicelli, X. Shan, D. M. Warsinger, T. Borca-Tasciuc, X. Ruan and T. Li, *Nano Lett.*, 2022, **22**, 2618-2626.
- 5 X. Han, L. Zhong, L. Zhang, L. Zhu, M. Zhou, S. Wang, D. Yu, H. Chen, Y. Hou and Y. Zheng, *Small*, 2023, **19**, 2303358.
- 6 K. Lu, C. Liu, J. Liu, Y. He, X. Tian, Z. Liu, Y. Cao, Y. Shen, W. Huang and K. Zhang, *ACS Appl. Mater. Interfaces*, 2022, **14**, 33032-33040.
- 7 W. Yao, X. Zhu, Z. Xu, R. A. Davis, G. Liu, H. Zhong, X. Lin, P. Dong, M. Ye and J. Shen, *ACS Appl. Mater. Interfaces*, 2022, **14**, 4680-4689.
- 8 C. Lei, Y. Guo, W. Guan, H. Lu, W. Shi and G. Yu, *Angew. Chem. Int. Ed.*, 2022, **61**, e202200271.
- 9 X. K. P. N. Hanikel, S. Chheda, H. Lyu, W.S. Jeong, J. Sauer, L. Gagliardi, O. M. Yagh, *Science*, 2021, **374**, 454-459.
- 10 Y. Sun, A. Spieß, C. Jansen, A. Nuhnen, S. Gökpınar, R. Wiedey, S. J. Ernst and C. Janiak, *J. Mater. Chem. A.*, 2020, **8**, 13364-13375.
- 11 J. Xu, T. Li, J. Chao, S. Wu, T. Yan, W. Li, B. Cao and R. Wang, *Angew. Chem. Int. Ed.*, 2020, **59**, 5202-5210.
- 12 Z. Chen, P. Li, X. Zhang, P. Li, M. C. Wasson, T. Islamoglu, J. F. Stoddart and O. K. Farha, *J. Am. Chem. Soc.*, 2019, **141**, 2900-2905.
- 13 Y. Chen, K. B. Idrees, M. R. Mian, F. A. Son, C. Zhang, X. Wang and O. K. Farha, *J. Am. Chem. Soc.*, 2023, **145**, 3055-3063.
